# Supplementary material for: A fast fabrication of copper nanowire transparent conductive electrodes by using pulsed laser irradiation
Source: PubMed Central journal article supplement (PMC5678115; doi:10.1038/s41598-017-15559-3), 2017-11-08
Supplement: 41598_2017_15559_MOESM1_ESM.pdf [file 41598_2017_15559_MOESM1_ESM.pdf]

# Supplementary Information

## A fast fabrication of copper nanowire transparent conductive electrodes by using pulsed laser irradiation

Nguyen-Hung Tran<sup>1</sup>, Thanh-Hung Duong<sup>1,\*</sup>, Hyun-Chul Kim<sup>1,\*</sup>

<sup>1</sup>High Safety Vehicle Core Technology Research Center, Department of Mechanical and Automotive Engineering, Inje University, Gimhae-si, South Korea

\* Corresponding Author; E-mail: duongthanhhung@inje.ac.kr,

mechkhc@inje.ac.kr, Tel: +82-55-320-3988, Fax: +82-55-324-1723

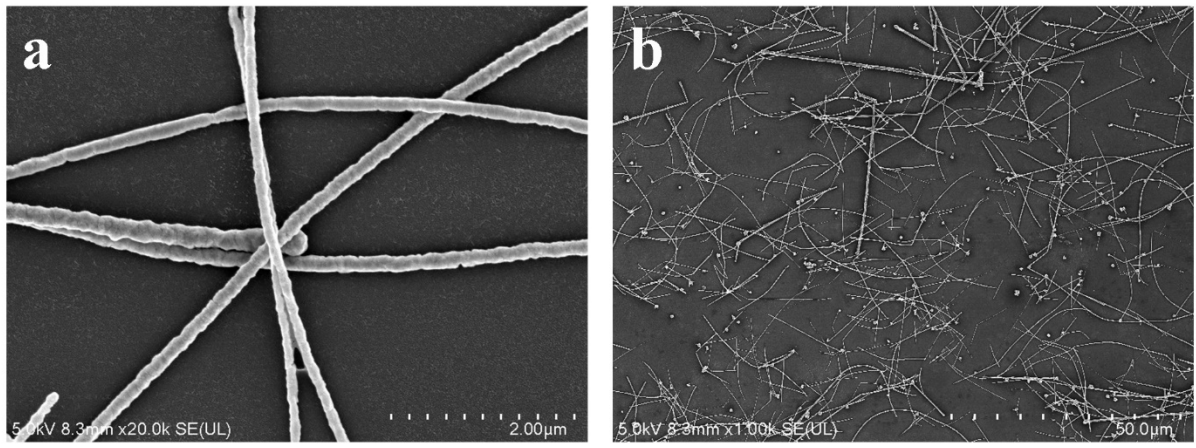

**Fig. S1.** SEM images of (a) synthesized Cu NWs and (b) the deposition of Cu NWs on a glass substrate the XRD of synthesized Cu NWs.

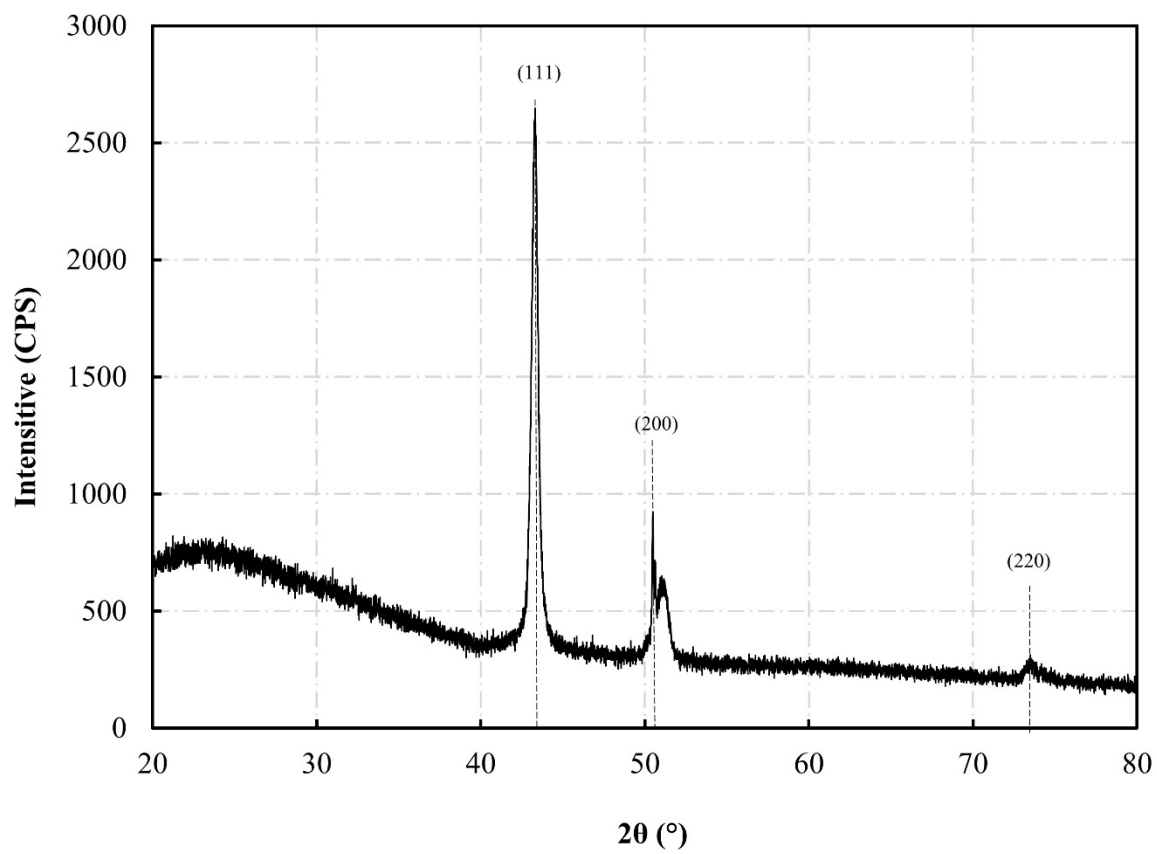

**Fig. S2.** The XRD of synthesized Cu NWs.

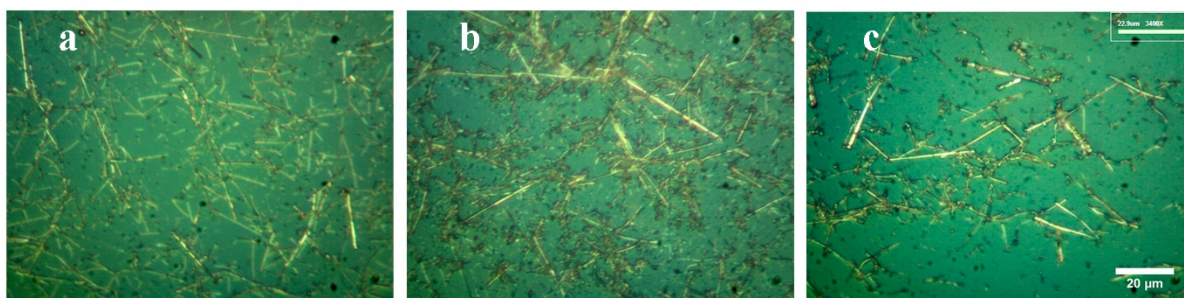

**Fig. S3.** (a) The as-coated Cu NWs on glass substrate. The Cu NW network after acid treatment with (b) 12  $\mu\text{J}$  and (c) 20  $\mu\text{J}$  irradiation laser power.
